# Supplementary material for: Adding Evidence-Based Interventions to Assertive Community Treatment: A Feasibility Study
Source: Atypon-hosted journal article supplement (doi:10.1176/appi.ps.201300143), 2014-03-03
Supplement: 689_ds001.pdf [file 689_ds001.pdf]

Figure 1. Consort flow-chart

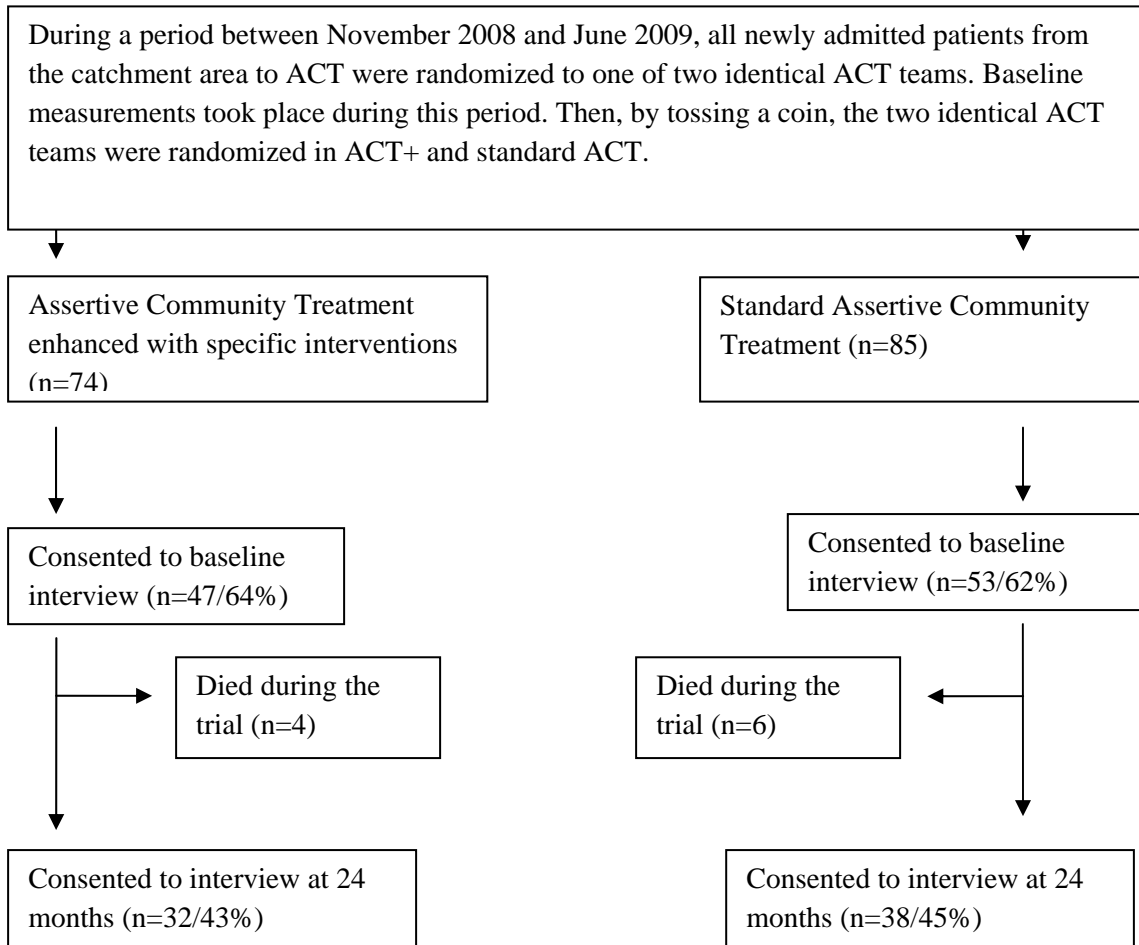

Table 1: Baseline characteristics of patients with severe mental illness assigned to enhanced (ACT+) or to standard assertive community treatment (ACT)

| Characteristic            | ACT+ (n=74)    |    | ACT (n=85)     |    | Test statistics | df  | p   |
|---------------------------|----------------|----|----------------|----|-----------------|-----|-----|
|                           | N              | %  | N              | %  |                 |     |     |
| <b>Male</b>               | 50             | 70 | 66             | 78 | $X^2 = 1.1$     | 1   | .29 |
| <b>Age (M ± SD)</b>       | 36.9 ±<br>10.8 |    | 37.8 ±<br>10.7 |    | t = .05         | 116 | .96 |
| <b>Primary diagnosis</b>  |                |    |                |    | $X^2 = 4.4$     | 7   | .73 |
| Schizophrenia             | 24             | 32 | 29             | 34 |                 |     |     |
| Other psychosis           | 6              | 8  | 12             | 14 |                 |     |     |
| Bipolar disorder          | 3              | 4  | 2              | 2  |                 |     |     |
| Major depressive disorder | 4              | 5  | 4              | 5  |                 |     |     |
| Personality Disorder      | 12             | 16 | 18             | 21 |                 |     |     |
| Autism/ADHD               | 11             | 15 | 9              | 11 |                 |     |     |
| Alcohol/drugs dependency  | 4              | 5  | 5              | 6  |                 |     |     |
| Other disorder            | 10             | 14 | 6              | 7  |                 |     |     |
| <b>Living situation</b>   |                |    |                |    | $X^2 = 1.1$     | 4   | .88 |
| Inpatient                 | 18             | 38 | 24             | 45 |                 |     |     |
| Sheltered home            | 6              | 13 | 4              | 8  |                 |     |     |
| Alone (with homecare)     | 12             | 26 | 12             | 23 |                 |     |     |
| Alone (without homecare)  | 5              | 11 | 10             | 19 |                 |     |     |
| Homeless                  | 6              | 12 | 3              | 6  |                 |     |     |
| <b>Paid job (yes)</b>     | 4              | 5  | 1              | 1  | $X^2 = 1.4$     | 1   | .24 |

Table 2: Service use data of patients with severe mental illness assigned to enhanced (ACT+) or to standard assertive community treatment (ACT)

|                                                         | Period of one year before inclusion date in the trial |         | Observation period first year of the trial |         | Observation period second year of the trial |         | Mixed models repeated measurement |     |                         |     |
|---------------------------------------------------------|-------------------------------------------------------|---------|--------------------------------------------|---------|---------------------------------------------|---------|-----------------------------------|-----|-------------------------|-----|
|                                                         | ACT+                                                  | ACT     | ACT+                                       | ACT     | ACT+                                        | ACT     | Time effect                       |     | Time * treatment effect |     |
|                                                         |                                                       |         |                                            |         |                                             |         | F                                 | p   | F                       | p   |
| inpatient days (M±SD)                                   | 32±67                                                 | 21±54   | 23±64                                      | 21±48   | 11±42                                       | 23±63   | 1.6                               | .20 | 2.4                     | .09 |
| number of total face-to-face outpatient contacts (M±SD) | 52±61                                                 | 47±53   | 60±62                                      | 50±47   | 67±68                                       | 44±55   | 0.8                               | .47 | 0.8                     | .43 |
| number of crisis contacts (M±SD)                        | 0.7±1.6                                               | 1.6±3.0 | 2.1±3.6                                    | 1.3±2.0 | 0.9±1.5                                     | 0.7±1.6 | 7.9                               | .00 | 2.1                     | .12 |
| Number of patients                                      | 74                                                    | 85      | 74                                         | 85      | 74                                          | 85      |                                   |     |                         |     |

Table 3: Outcome measures of patients with severe mental illness assigned to enhanced (ACT+) or to standard assertive community treatment (ACT)

| Outcome                | Baseline assessment |          | Second assessment (12 months later) |          | Mixed models repeated measurements |      |                         |     |
|------------------------|---------------------|----------|-------------------------------------|----------|------------------------------------|------|-------------------------|-----|
|                        | ACT+                | ACT      | ACT+                                | ACT      | Time effect                        |      | Time * treatment effect |     |
|                        | M±SD                | M±SD     | M±SD                                | M±SD     | F                                  | p    | F                       | p   |
| <b>PANSS</b>           |                     |          |                                     |          |                                    |      |                         |     |
| positive symptom scale | 13.0±6.3            | 13.1±4.8 | 12.7±6.1                            | 12.5±5.2 | .6                                 | .45  | .3                      | .59 |
| negative symptom scale | 17.6±6.8            | 15.9±6.5 | 16.6±6.7                            | 15.4±5.8 | 1.3                                | .25  | .2                      | .69 |
| general symptom scale  | 31.9±7.2            | 0.9±7.0  | 30.0±8.3                            | 30.1±7.4 | 1.4                                | .24  | .1                      | .70 |
| <b>MADRS</b>           | 13.7±7.2            | 12.8±9.8 | 10.8±9.1                            | 8.9±6.2  | 12.2                               | <.01 | .0                      | .86 |
| <b>MANSA</b>           | 4.3±2.1             | 4.7±3.0  | 4.5±1.2                             | 4.9±0.7  | 1.1                                | .30  | .0                      | .89 |
| <b>CANSAS</b>          |                     |          |                                     |          |                                    |      |                         |     |
| needs                  | 7.8±4.3             | 7.7±3.1  | 8.2±3.4                             | 7.8±9.5  | 3.2                                | .07  | 2.9                     | .10 |
| unmet needs            | 4.5±4.4             | 4.5±3.0  | 3.5±2.7                             | 2.0±1.9  | 17.5                               | <.01 | 1.1                     | .29 |
| <b>SOFAS</b>           | 42.3±9.1            | 45.1±9.7 | 53.6±12                             | 49.3±11  | 8.1                                | <.01 | 1.4                     | .24 |
